# Supplementary material for: Physiologically Based Pharmacokinetic Modeling of Antibiotics in Children: Perspectives on Model-Informed Precision Dosing
Source: MDPI journal article supplement (doi:10.3390/antibiotics14060541), 2025-05-24
Supplement: s1 [file Table S2_Articles initially retrieved.pdf › Table S2_Articles initially retrieved.pdf]

| No. | Title                                                                                                                                                                               | First Author  | Journal/Book                       | Publication Year | DOI                             |
|-----|-------------------------------------------------------------------------------------------------------------------------------------------------------------------------------------|---------------|------------------------------------|------------------|---------------------------------|
| 1   | Prediction of tissue exposures of polymyxin-B, amikacin and sulbactam using physiologically-based pharmacokinetic modeling                                                          | Wu M          | Front Microbiol                    | 2024             | 10.3389/fmicb.2024.1435906      |
| 2   | Physiological modeling of the metaverse of the Mycobacterium tuberculosis beta-CA inhibition mechanism                                                                              | Giovannuzzi S | Comput Biol Med                    | 2024             | 10.1016/j.compbimed.2024.109029 |
| 3   | PBPK Modeling of Entrectinib and Its Active Metabolite to Derive Dose Adjustments in Pediatric Populations Co-Administered with CYP3A4 Inhibitors                                   | Umehara K     | Clin Pharmacol Ther                | 2024             | 10.1002/cpt.3386                |
| 4   | Age-Dependent Abundance of CYP450 Enzymes Involved in Metronidazole Metabolism: Application to Pediatric PBPK Modeling                                                              | Parvez MM     | Clin Pharmacol Ther                | 2024             | 10.1002/cpt.3354                |
| 5   | Skin pharmacokinetics of miltefosine in the treatment of post-kala-azar dermal leishmaniasis in South Asia                                                                          | Palić S       | J Antimicrob Chemother             | 2024             | doi: 10.1093/jac/dkae129        |
| 6   | Population pharmacokinetic analysis for dose regimen optimization of vancomycin in Southern Chinese children                                                                        | Shen X        | CPT Pharmacometrics Syst Pharmacol | 2024             | 10.1002/psp4.13151              |
| 7   | Physiologically-Based Pharmacokinetic Modeling and Dosing Optimization of Cefotaxime in Preterm and Term Neonates                                                                   | Li Q          | J Pharm Sci                        | 2024             | 10.1016/j.xphs.2024.03.002      |
| 8   | Maximum likelihood estimation of renal transporter ontogeny profiles for pediatric PBPK modeling                                                                                    | Hunt JP       | CPT Pharmacometrics Syst Pharmacol | 2024             | 10.1002/psp4.13102              |
| 9   | Development and application of neonatal physiology-based pharmacokinetic models of amikacin and fosfomycin to assess pharmacodynamic target attainment                              | Darlow CA     | CPT Pharmacometrics Syst Pharmacol | 2024             | 10.1002/psp4.13097              |
| 10  | Meropenem extraction by ex vivo extracorporeal life support circuits                                                                                                                | Honeycutt CC  | J Extra Corpor Technol             | 2023             | 10.1051/ject/2023035            |
| 11  | Preliminary evidence for sustained efficacy of CFTR modulator therapy with concomitant rifabutin administration                                                                     | Hong E        | J Cyst Fibros                      | 2024             | 10.1016/j.jcf.2023.11.015       |
| 12  | Development of a Generic Fetal Physiologically Based Pharmacokinetic Model and Prediction of Human Maternal and Fetal Organ Concentrations of Cefuroxime                            | Liu XI        | Clin Pharmacokinet                 | 2024             | 10.1007/s40262-023-01323-6      |
| 13  | Formulation development, in vivo bioequivalence and pediatric PBPK modeling studies of taste-masked ciprofloxacin chewable tablets                                                  | Usmani MT     | Sci Rep                            | 2023             | 10.1038/s41598-023-43423-0      |
| 14  | Vancomycin population pharmacokinetics analysis in Chinese paediatric patients with varying degrees of renal function and ages: development of new practical dosing recommendations | Chen J        | J Antimicrob Chemother             | 2023             | 10.1093/jac/dkad202             |
| 15  | Development of a Minimalistic Physiologically Based Pharmacokinetic (mPBPK) Model for the Preclinical Development of Spectinamide Antibiotics                                       | Parmar KR     | Pharmaceutics                      | 2023             | 10.3390/pharmaceutics15061759   |
| 16  | Physiologically-Based Pharmacokinetic Modelling to Predict the Pharmacokinetics and Pharmacodynamics of Linezolid in Adults and Children with Tuberculous Meningitis                | Litjens CHC   | Antibiotics (Basel)                | 2023             | 10.3390/antibiotics12040702     |
| 17  | Develop adult extrapolation to pediatrics and pediatric dose optimization based on the physiological pharmacokinetic model of azithromycin                                          | Liang L       | Biopharm Drug Dispos               | 2023             | 10.1002/bdd.2352                |
| 18  | Physiologically based pharmacokinetic modelling to inform combination dosing regimens of ceftaroline and daptomycin in special populations                                          | Martins FS    | Br J Clin Pharmacol                | 2023             | 10.1111/bcp.15731               |
| 19  | Pan-Genomics of Escherichia albertii for Antibiotic Resistance Profiling in Different Genome Fractions and Natural Product Mediated Intervention: In Silico Approach                | Jalal K       | Life (Basel)                       | 2023             | 10.3390/life13020541            |
| 20  | Predictive Performance of Physiologically Based Pharmacokinetic Modelling of Beta-Lactam Antibiotic Concentrations in Adipose, Bone, and Muscle Tissues                             | De Sutter PJ  | Drug Metab Dispos                  | 2023             | 10.1124/dmd.122.001129          |
| 21  | Pharmacokinetics and Target Attainment of ss-lactam Antibiotics in Older People: A Systematic Review of Current Literature                                                          | Vervalcke J   | Clin Pharmacokinet                 | 2023             | 10.1007/s40262-022-01196-1      |
| 22  | Verifying in vitro-determined enzyme contributions to cannabidiol clearance for exposure predictions in human through physiologically-based pharmacokinetic modeling                | Yeung CHT     | CPT Pharmacometrics Syst Pharmacol | 2023             | 10.1002/psp4.12908              |
| 23  | Foetal and neonatal exposure prediction and dosing evaluation for ampicillin using a physiologically-based pharmacokinetic modelling approach                                       | Li S          | Br J Clin Pharmacol                | 2023             | 10.1111/bcp.15589               |
| 24  | Physiologically based pharmacokinetic model to predict drug concentrations of breast cancer resistance protein substrates in milk                                                   | Zhang T       | Biopharm Drug Dispos               | 2022             | 10.1002/bdd.2335                |
| 25  | Prediction of Tissue Exposures of Meropenem, Colistin, and Sulbactam in Pediatrics Using Physiologically Based Pharmacokinetic Modeling                                             | Zhu S         | Clin Pharmacokinet                 | 2022             | 10.1007/s40262-022-01161-y      |
| 26  | Population Pharmacokinetics of Vancomycin in Pregnant Women                                                                                                                         | Goyal RK      | Front Pharmacol                    | 2022             | 10.3389/fphar.2022.873439       |
| 27  | Leveraging physiologically based pharmacokinetic modeling to optimize dosing for lopinavir/ritonavir with rifampin in pediatric patients                                            | Salerno SN    | Pharmacotherapy                    | 2023             | 10.1002/phar.2703               |
| 28  | Development and application of a pediatric mechanistic kidney model                                                                                                                 | Salem F       | CPT Pharmacometrics Syst Pharmacol | 2022             | 10.1002/psp4.12798              |
| 29  | Physiologically Based Pharmacokinetic Modeling and Dose Adjustment of Teicoplanin in Pediatric Patients With Renal Impairment                                                       | Xu J          | J Clin Pharmacol                   | 2022             | 10.1002/jcph.2000               |
| 30  | Optimal Teicoplanin Dosing Regimen in Neonates and Children Developed by Leveraging Real-World Clinical Information                                                                 | Yamada T      | Ther Drug Monit                    | 2022             | 10.1097/FTD.0000000000000930    |
| 31  | Development and Evaluation of a Virtual Population of Children with Obesity for Physiologically Based Pharmacokinetic Modeling                                                      | Gerhart JG    | Clin Pharmacokinet                 | 2022             | 10.1007/s40262-021-01072-4      |

|    |                                                                                                                                                                                                                                               |                |                                    |      |                                   |
|----|-----------------------------------------------------------------------------------------------------------------------------------------------------------------------------------------------------------------------------------------------|----------------|------------------------------------|------|-----------------------------------|
| 32 | Prediction of Moxifloxacin Concentrations in Tuberculosis Patient Populations by Physiologically Based Pharmacokinetic Modeling                                                                                                               | Litjens CHC    | J Clin Pharmacol                   | 2022 | 10.1002/jcph.1972                 |
| 33 | Investigating the Critical Variables of Azithromycin Oral Absorption Using In Vitro Tests and PBPK Modeling                                                                                                                                   | Guimarães M    | J Pharm Sci                        | 2021 | 10.1016/j.xphs.2021.09.013        |
| 34 | Evidence-Based Guidelines for Drug Interaction Studies: Model-Informed Time Course of Intestinal and Hepatic CYP3A4 Inhibition by Clarithromycin                                                                                              | Kapetas AJ     | AAPS J                             | 2021 | 10.1208/s12248-021-00632-7        |
| 35 | Ceftaroline Dosage Optimized for Pediatric Patients With Renal Impairment Using Physiologically Based Pharmacokinetic Modeling                                                                                                                | Zhou J         | J Clin Pharmacol                   | 2021 | 10.1002/jcph.1944                 |
| 36 | Physiologically Based Pharmacokinetic Modeling for Selumetinib to Evaluate Drug-Drug Interactions and Pediatric Dose Regimens                                                                                                                 | Cohen-Rabbie S | J Clin Pharmacol                   | 2021 | 10.1002/jcph.1935                 |
| 37 | Physiologically Based Pharmacokinetic Modeling of Meropenem in Preterm and Term Infants                                                                                                                                                       | Ganguly S      | Clin Pharmacokinet                 | 2021 | 10.1007/s40262-021-01046-6        |
| 38 | Leveraging Physiologically Based Pharmacokinetic Modeling and Experimental Data to Guide Dosing Modification of CYP3A-Mediated Drug-Drug Interactions in the Pediatric Population                                                             | Salerno SN     | Drug Metab Dispos                  | 2021 | 10.1124/dmd.120.000318            |
| 39 | Estimation of Ontogeny Functions for Renal Transporters Using a Combined Population Pharmacokinetic and Physiology-Based Pharmacokinetic Approach: Application to OAT1,3                                                                      | Cristea S      | AAPS J                             | 2021 | 10.1208/s12248-021-00595-9        |
| 40 | Application of Physiologically Based Pharmacokinetic-Pharmacodynamic Modeling in Preterm Neonates to Guide Gentamicin Dosing Decisions and Predict Antibacterial Effect                                                                       | Neeli H        | J Clin Pharmacol                   | 2021 | 10.1002/jcph.1890                 |
| 41 | Next generation risk assessment (NGRA): Bridging in vitro points-of-departure to human safety assessment using physiologically-based kinetic (PBK) modelling - A case study of doxorubicin with dose metrics considerations                   | Li H           | Toxicol In Vitro                   | 2021 | 10.1016/j.tiv.2021.105171         |
| 42 | Determination of vancomycin exposure target and individualised dosing recommendations for neonates: model-informed precision dosing                                                                                                           | Tang Z         | Int J Antimicrob Agents            | 2021 | 10.1016/j.ijantimicag.2021.106300 |
| 43 | Dosage Adjustment for Ceftazidime in Pediatric Patients With Renal Impairment Using Physiologically Based Pharmacokinetic Modeling                                                                                                            | Zhou J         | J Pharm Sci                        | 2021 | 10.1016/j.xphs.2021.02.001        |
| 44 | Teicoplanin physiologically based pharmacokinetic modeling offers a quantitative assessment of a theoretical influence of serum albumin and renal function on its disposition                                                                 | Emoto C        | Eur J Clin Pharmacol               | 2021 | 10.1007/s00228-021-03098-w        |
| 45 | Model-Informed Pediatric Dose Selection for Dapagliflozin by Incorporating Developmental Changes                                                                                                                                              | Jo H           | CPT Pharmacometrics Syst Pharmacol | 2021 | 10.1002/psp4.12577                |
| 46 | Physiologically based pharmacokinetic model of renally cleared antibacterial drugs in Chinese renal impairment patients                                                                                                                       | Cui C          | Biopharm Drug Dispos               | 2021 | 10.1002/bdd.2258                  |
| 47 | Linezolid-induced thrombocytopenia in a child with a liver transplant: A case report                                                                                                                                                          | Lu X           | Int J Clin Pharmacol Ther          | 2021 | 10.5414/CP203754                  |
| 48 | Sequestration of Voriconazole and Vancomycin Into Contemporary Extracorporeal Membrane Oxygenation Circuits: An in vitro Study                                                                                                                | Raffaeli G     | Front Pediatr                      | 2020 | 10.3389/fped.2020.00468           |
| 49 | Saliva versus Plasma Therapeutic Drug Monitoring of Gentamicin in Jordanian Preterm Infants. Development of a Physiologically-Based Pharmacokinetic (PBPk) Model and Validation of Class II Drugs of Salivary Excretion Classification System | Idkaidek N     | Drug Res (Stuttg)                  | 2020 | 10.1055/a-1233-3582               |
| 50 | Integration of physiological changes during the postpartum period into a PBPk framework and prediction of amoxicillin disposition before and shortly after delivery                                                                           | Dallmann A     | J Pharmacokinet Pharmacodyn        | 2020 | 10.1007/s10928-020-09706-z        |
| 51 | Formulation and Bioequivalence Testing of Fixed-Dose Combination Orally Disintegrating Tablets for the Treatment of Tuberculosis in the Paediatric Population                                                                                 | Dennison TJ    | J Pharm Sci                        | 2020 | 10.1016/j.xphs.2020.07.016        |
| 52 | Physiologically based pharmacokinetic-pharmacodynamic evaluation of meropenem plus fosfomycin in paediatrics                                                                                                                                  | Martins FS     | Br J Clin Pharmacol                | 2021 | 10.1111/bcp.14456                 |
| 53 | Modelled plasma concentrations of pemafigrate with co-administered typical cytochrome P450 inhibitors clopidogrel, fluconazole or clarithromycin predicted by physiologically based pharmacokinetic modelling in virtual populations          | Ogawa SI       | Xenobiotica                        | 2020 | 10.1080/00498254.2020.1793030     |
| 54 | A Physiologically Based Pharmacokinetic Model of Ertapenem in Pediatric Patients With Renal Impairment                                                                                                                                        | Ye L           | J Pharm Sci                        | 2020 | 10.1016/j.xphs.2020.06.010        |
| 55 | First dose in neonates: pharmacokinetic bridging study from juvenile mice to neonates for drugs metabolized by CYP3A                                                                                                                          | Ye PP          | Xenobiotica                        | 2020 | 10.1080/00498254.2020.1768454     |
| 56 | Use of normalized prediction distribution errors for assessing population physiologically-based pharmacokinetic model adequacy                                                                                                                | Maharaj AR     | J Pharmacokinet Pharmacodyn        | 2020 | 10.1007/s10928-020-09684-2        |
| 57 | Drug Interactions for Low-Dose Inhaled Nemiralisib: A Case Study Integrating Modeling, In Vitro, and Clinical Investigations                                                                                                                  | Patel A        | Drug Metab Dispos                  | 2020 | 10.1124/dmd.119.089003            |
| 58 | The development of a population physiologically based pharmacokinetic model for mycophenolic mofetil and mycophenolic acid in humans using data from plasma, saliva, and kidney tissue                                                        | Alsmadi MM     | Biopharm Drug Dispos               | 2019 | 10.1002/bdd.2206                  |
| 59 | Preterm Physiologically Based Pharmacokinetic Model. Part II: Applications of the Model to Predict Drug Pharmacokinetics in the Preterm Population                                                                                            | Abduljalil K   | Clin Pharmacokinet                 | 2020 | 10.1007/s40262-019-00827-4        |
| 60 | Using mechanistic physiologically-based pharmacokinetic models to assess prenatal drug exposure: Thalidomide versus efavirenz as case studies                                                                                                 | Atoyebi SA     | Eur J Pharm Sci                    | 2019 | 10.1016/j.ejps.2019.105068        |
| 61 | Application of Physiologically-Based and Population Pharmacokinetic Modeling for Dose Finding and Confirmation During the Pediatric Development of Moxifloxacin                                                                               | Willmann S     | CPT Pharmacometrics Syst Pharmacol | 2019 | 10.1002/psp4.12446                |

|    |                                                                                                                                                                                                                                                  |                   |                                    |      |                                    |
|----|--------------------------------------------------------------------------------------------------------------------------------------------------------------------------------------------------------------------------------------------------|-------------------|------------------------------------|------|------------------------------------|
| 62 | Population Pharmacokinetic Modeling of Gentamicin in Pediatrics                                                                                                                                                                                  | Wang H            | J Clin Pharmacol                   | 2019 | 10.1002/jcph.1479                  |
| 63 | Development of a physiologically-based pharmacokinetic pediatric brain model for prediction of cerebrospinal fluid drug concentrations and the influence of meningitis                                                                           | Verscheijden LFM  | PLoS Comput Biol                   | 2019 | 10.1371/journal.pcbi.1007117       |
| 64 | Towards a Generic Tool for Prediction of Meropenem Systemic and Infection-Site Exposure: A Physiologically Based Pharmacokinetic Model for Adult Patients with Pneumonia                                                                         | Thémans P         | Drugs R D                          | 2019 | 10.1007/s40268-019-0268-x          |
| 65 | Clinical Pharmacokinetic Studies in Pregnant Women and the Relevance of Pharmacometric Tools                                                                                                                                                     | Dallmann A        | Curr Pharm Des                     | 2019 | 0.2174/1381612825666190320135137   |
| 66 | Physiologically Based Pharmacokinetic Modeling for Trimethoprim and Sulfamethoxazole in Children                                                                                                                                                 | Thompson EJ       | Clin Pharmacokinet                 | 2019 | 10.1007/s40262-018-00733-1         |
| 67 | Physiologically based pharmacokinetic modelling to predict exposure differences in healthy volunteers and subjects with renal impairment: Ceftazidime case study                                                                                 | Zhou L            | Basic Clin Pharmacol Toxicol       | 2019 | 10.1111/bcpt.13209                 |
| 68 | Predicting Drug-Drug Interactions Between Rifampicin and Long-Acting Cabotegravir and Rilpivirine Using Physiologically Based Pharmacokinetic Modeling                                                                                           | Rajoli RKR        | J Infect Dis                       | 2019 | 10.1093/infdis/jiy726              |
| 69 | Physiologically-Based Pharmacokinetic model for Ciprofloxacin in children with complicated Urinary Tract Infection                                                                                                                               | Balbas-Martinez V | Eur J Pharm Sci                    | 2019 | 10.1016/j.ejps.2018.11.033         |
| 70 | Intensified antibiotic treatment of tuberculosis meningitis                                                                                                                                                                                      | Cresswell FV      | Expert Rev Clin Pharmacol          | 2019 | 10.1080/17512433.2019.1552831      |
| 71 | Optimizing Antibiotic Drug Therapy in Pediatrics: Current State and Future Needs                                                                                                                                                                 | Le J              | J Clin Pharmacol                   | 2019 | 10.1002/jcph.1128                  |
| 72 | Development of a physiologically based pharmacokinetic model for mefloquine and its application alongside a clinical effectiveness model to select an optimal dose for prevention of malaria in young Caucasian children                         | Johnson TN        | Br J Clin Pharmacol                | 2019 | 10.1111/bcp.13764                  |
| 73 | Treatment and outcomes in children with multidrug-resistant tuberculosis: A systematic review and individual patient data meta-analysis                                                                                                          | Harausz EP        | PLoS Med                           | 2018 | 10.1371/journal.pmed.1002591       |
| 74 | Modelling the long-acting administration of anti-tuberculosis agents using PBPK: a proof of concept study                                                                                                                                        | Rajoli RKR        | Int J Tuberc Lung Dis              | 2018 | 10.5588/ijtld.17.0515              |
| 75 | Development of a Physiologically Based Pharmacokinetic Model of Ethionamide in the Pediatric Population by Integrating Flavin-Containing Monooxygenase 3 Maturational Changes Over Time                                                          | Nguyen PTT        | J Clin Pharmacol                   | 2018 | 10.1002/jcph.1133                  |
| 76 | A Physiologically-Based Pharmacokinetic Model to Describe Ciprofloxacin Pharmacokinetics Over the Entire Span of Life                                                                                                                            | Schlender JF      | Clin Pharmacokinet                 | 2018 | 10.1007/s40262-018-0661-6          |
| 77 | Using a Vancomycin PBPK Model in Special Populations to Elucidate Case-Based Clinical PK Observations                                                                                                                                            | Emoto C           | PT Pharmacometrics Syst Pharmacol  | 2018 | 10.1002/psp4.12279                 |
| 78 | Pharmacokinetic/pharmacodynamic drug-drug interactions of avatrombopag when coadministered with dual or selective CYP2C9 and CYP3A interacting drugs                                                                                             | Nomoto M          | Br J Clin Pharmacol                | 2018 | 10.1111/bcp.13517                  |
| 79 | Development of Guanfacine Extended-Release Dosing Strategies in Children and Adolescents with ADHD Using a Physiologically Based Pharmacokinetic Model to Predict Drug-Drug Interactions with Moderate CYP3A4 Inhibitors or Inducers             | Li A              | Paediatr Drugs                     | 2018 | 10.1007/s40272-017-0270-0          |
| 80 | Development of an Adult Physiologically Based Pharmacokinetic Model of Solithromycin in Plasma and Epithelial Lining Fluid                                                                                                                       | Salerno SN        | CPT Pharmacometrics Syst Pharmacol | 2017 | 10.1002/psp4.12252                 |
| 81 | Development of a paediatric physiologically based pharmacokinetic model to assess the impact of drug-drug interactions in tuberculosis co-infected malaria subjects: A case study with artemether-lumefantrine and the CYP3A4-inducer rifampicin | Olafuyi O         | Eur J Pharm Sci                    | 2017 | 10.1016/j.ejps.2017.05.043         |
| 82 | Pharmacokinetic changes of norfloxacin based on expression of MRP2 after acute exposure to high altitude at 4300m                                                                                                                                | Luo B             | Biomed Pharmacother                | 2017 | 10.1016/j.biopha.2017.02.092       |
| 83 | Development of a Pediatric Physiologically-Based Pharmacokinetic Model of Clindamycin Using Opportunistic Pharmacokinetic Data                                                                                                                   | Hornik CP         | Clin Pharmacokinet                 | 2017 | 10.1007/s40262-017-0525-5          |
| 84 | CaCO3 nanoparticles as an ultra-sensitive tumor-pH-responsive nanoplatfrom enabling real-time drug release monitoring and cancer combination therapy                                                                                             | Dong Z            | Biomaterials                       | 2016 | 10.1016/j.biomaterials.2016.09.025 |
| 85 | The amikacin research program: a stepwise approach to validate dosing regimens in neonates                                                                                                                                                       | Smits A           | Expert Opin Drug Metab Toxicol     | 2017 | 10.1080/17425255.2017.1234606      |
| 86 | Physiologically Based Pharmacokinetic Prediction of Linezolid and Emtricitabine in Neonates and Infants                                                                                                                                          | Duan P            | Clin Pharmacokinet                 | 2017 | 10.1007/s40262-016-0445-9          |
| 87 | Clinical research in neonates and infants: Challenges and perspectives                                                                                                                                                                           | Coppini R         | Pharmacol Res                      | 2016 | 10.1016/j.phrs.2016.04.025         |
| 88 | Development of a physiologically based pharmacokinetic model of actinomycin D in children with cancer                                                                                                                                            | Walsh C           | Br J Clin Pharmacol                | 2016 | 10.1111/bcp.12878                  |
| 89 | A physiologically based pharmacokinetic modeling approach to predict drug-drug interactions between domperidone and inhibitors of CYP3A4                                                                                                         | Templeton I       | Biopharm Drug Dispos               | 2016 | 10.1002/bdd.1992                   |
