# Supplementary material for: Physiologically Based Pharmacokinetic Modeling of Antibiotics in Children: Perspectives on Model-Informed Precision Dosing
Source: MDPI journal article supplement (doi:10.3390/antibiotics14060541), 2025-05-24
Supplement: s1 [file Table S3_List of antibiotics PBPK model.pdf › Table S3_List of antibiotics PBPK model.pdf]

Table S2 List of antibiotics PBPK model

| Number | Drug                                             | Validation tissue                                       | Administration route            | Verified PK parameters                                                           | Full or minimal in case of using Simcyp | Pediatric age population                                                                   | Objective (in addition to age-dependent optimal dose)                                                    | Target infection                                                                              | Assumed target bacteria                                                                      | Target PK/PD indices                                                                                                                                                                                 | Adult model verification | Software        | PMID     | Journal                            | Year |
|--------|--------------------------------------------------|---------------------------------------------------------|---------------------------------|----------------------------------------------------------------------------------|-----------------------------------------|--------------------------------------------------------------------------------------------|----------------------------------------------------------------------------------------------------------|-----------------------------------------------------------------------------------------------|----------------------------------------------------------------------------------------------|------------------------------------------------------------------------------------------------------------------------------------------------------------------------------------------------------|--------------------------|-----------------|----------|------------------------------------|------|
| 1      | Polymyxin-B<br>Amikacin<br>sulbactam             | Plasma<br>Heart<br>Lung<br>Skin                         | IV                              | AUC, C <sub>max</sub>                                                            | -                                       | 2<18 years                                                                                 | Tissue target attainment for acinetobacter. Baumannii                                                    | -                                                                                             | <i>Acinetobacter baumannii</i>                                                               | Polymyxin B: fAUC <sub>0-24</sub> /MIC>=8.2<br>Amikacin: fAUC <sub>0-24</sub> /MIC>=80<br>Sulbactam: fT>MIC>=40%                                                                                     | This study               | PK-Sim v10.0    | 39435440 | Front Microbiol                    | 2024 |
| 2      | Cefotaxime                                       | Plasma                                                  | IV                              | AUC <sub>0-inf</sub> , C <sub>max</sub>                                          | -                                       | Neonate                                                                                    | Dose selection for preterm and term neonates                                                             | -                                                                                             | Enterobacteriaceae (PNA: 0-6 days)<br><i>Staphylococcus Aureus</i> (PNA:7-28 days)           | fT>MIC=100%                                                                                                                                                                                          | This study               | PK-Sim v11.0    | 38460573 | J Pharm Sci                        | 2024 |
| 3      | Amikacin<br>Fosfomycin                           | Plasma                                                  | IV                              | AUC, C <sub>max</sub>                                                            | Full                                    | Neonate                                                                                    | Dose selection for neonate                                                                               | Sepsis                                                                                        | <i>Enterobacterales</i>                                                                      | Amikacin: C <sub>max</sub> /MIC>10, AUC/MIC>23 for stasis and >82 for 1-log <sub>10</sub> CFU/mL reduction<br>Fosfomycin: AUC/MIC>21.4 for stasis and >62.5 for 1-log <sub>10</sub> CFU/mL reduction | This study               | Simcyp v22.0    | 38108548 | CPT Pharmacometrics Syst Pharmacol | 2024 |
| 4      | Linezolid                                        | Plasma<br>Cranial CSF                                   | IV                              | AUC                                                                              | Full                                    | 0.25-21 years                                                                              | Prediction of cranial cerebrospinal fluid profile                                                        | Tuberculous meningitis                                                                        | <i>Mycobacterium tuberculosis</i>                                                            | AUC/MIC>119<br>T>MIC>80%                                                                                                                                                                             | This study               | Simcyp v19.0    | 37107064 | Antibiotics (Basel)                | 2023 |
| 5      | Azithromycin                                     | Plasma                                                  | IV, PO                          | AUC, C <sub>max</sub> , T <sub>max</sub>                                         | -                                       | 0.5-2, 3-6, 7-12, and 13-18 years                                                          | Dose selection for children of different ages                                                            | Community-acquired pneumonia                                                                  | -                                                                                            | fAUC/MIC>=25                                                                                                                                                                                         | This study               | PK-Sim v8.0     | 37080927 | Biopharm Drug Dispos               | 2023 |
| 6      | Daptomycin<br>Ceftaroline                        | Plasma<br>Lung<br>Skin                                  | IV                              | AUC, C <sub>max</sub>                                                            | Full                                    | 2-<6, 6-<12, and 12-<18 years                                                              | Dose selection in paediatrics, renally impaired, obese and geriatrics                                    | Bacteraemia                                                                                   | MRSA                                                                                         | Daptomycin: fAUC/MIC>40<br>Ceftaroline: fT>MIC>=35%                                                                                                                                                  | This study               | PK-Sim v9.0     | 37005335 | Br J Clin Pharmacol                | 2023 |
| 7      | Ampicillin                                       | Plasma                                                  | IV, PO                          | AUC <sub>0-inf</sub> , C <sub>max</sub>                                          | Full                                    | Neonate                                                                                    | Dose selection for neonate and during the intrapartum period                                             | Neonate: Sepsis<br>Intrapartum period: prophylaxis for Group B Streptococcus infection        | <i>Listeria monocytogenes</i> ,<br><i>Escherichia coli</i> ,<br>Group B <i>Streptococcus</i> | fT>MIC>=50% , >=75% , and >=100%                                                                                                                                                                     | This study               | Simcyp v21.0    | 36357171 | Br J Clin Pharmacol                | 2023 |
| 8      | Meropenem<br>Sulbactam<br>Colistin               | Plasma<br>Heart<br>Lung<br>Skin<br>Brain ISF (colistin) | IV                              | AUC <sub>0-24h</sub> , C <sub>max</sub>                                          | -                                       | 2<18 years                                                                                 | Tissue target attainment for acinetobacter. baumannii with and without renal impairment (CrCL<50 mL/min) | Lung, skin, heart-related infections                                                          | <i>Acinetobacter baumannii</i>                                                               | Meropenem: fT>MIC>=40%<br>Sulbactam: fT>MIC>=60%<br>Colistin: fAUC/MIC>=7.4                                                                                                                          | This study               | PK-Sim v10.0    | 35947360 | Clin Pharmacokinet                 | 2022 |
| 9      | Teicoplanin                                      | Plasma                                                  | IV                              | AUC <sub>0-4h</sub> , C <sub>max</sub>                                           | -                                       | 2-12 years                                                                                 | Dose selection in pediatrics with renal impairment (GFR: 60-89, 30-59, 15-29 mL/min/1.73m2)              | -                                                                                             | <i>Staphylococcus aureus</i>                                                                 | fAUC/MIC>=345                                                                                                                                                                                        | This study               | GastroPlus v9.8 | 34761398 | J Clin Pharmacol                   | 2022 |
| 10     | Clindamycin<br>Trimethoprim/sul<br>famethoxazole | Plasma                                                  | IV, PO                          | AUC <sub>ss</sub> , C <sub>max</sub>                                             | -                                       | Clindamycin: >2-6 and >6-18 years<br>Trimethoprim/sulfamethoxazole: >2-12 and >12-18 years | Dose selection in pediatrics with obese                                                                  | -                                                                                             | -                                                                                            | -                                                                                                                                                                                                    | Previous study           | PK-Sim v9.0     | 34617262 | Clin Pharmacokinet                 | 2022 |
| 11     | Moxifloxacin                                     | Plasma                                                  | IV, PO                          | AUC <sub>0-24h</sub> , C <sub>max</sub>                                          | Full                                    | 3 months-<2, 2-<6, and 6-14 years                                                          | Effect of DDI with rifanpicin on PK                                                                      | Tuberculous infection                                                                         | Multidrug-resistance tuberculosis                                                            | -                                                                                                                                                                                                    | This study               | Simcyp v19.0    | 34554580 | J Clin Pharmacol                   | 2022 |
| 12     | Azithromycin                                     | Plasma                                                  | IV, PO                          | AUC, C <sub>max</sub> , T <sub>max</sub>                                         | Minimal                                 | 0.5-2, >2-6, >6-12, and >12-16 years                                                       | Identification of critical variables affecting oral absorption                                           | -                                                                                             | -                                                                                            | -                                                                                                                                                                                                    | This study               | Simcyp v18.2    | 34530004 | J Pharm Sci                        | 2021 |
| 13     | Ceftaroline                                      | Plasma                                                  | IV                              | AUC <sub>0-4h</sub> , C <sub>max</sub> , t <sub>1/2</sub> , V <sub>ss</sub> , CL | -                                       | Neonate with full-term and preterm, and 1 and 6 years                                      | Dose selection in pediatric patients with renal impairment (GFR: 60-89, 30-59, 15-29, <15 mL/min/1.73m2) | Acute bacterial skin and skin structure infections and community-acquired bacterial pneumonia | <i>Staphylococcus aureus</i> ,<br><i>Streptococcus pneumoniae</i>                            | fT>MIC>=36% for <i>Staphylococcus aureus</i><br>fT>MIC>=44% for <i>Streptococcus pneumoniae</i>                                                                                                      | This study               | GastroPlus v9.7 | 34329494 | J Clin Pharmacol                   | 2021 |
| 14     | Meropenem                                        | Plasma                                                  | IV                              | AUC <sub>0-inf</sub> , CL                                                        | -                                       | <3 month                                                                                   | Dose selection for preterm and term infants                                                              | Complicated intra-abdominal infection                                                         | -                                                                                            | fT>MIC>=50% for a MIC of 4 mg/L<br>fT>MIC>=75% for a MIC of 2 mg/L                                                                                                                                   | This study               | PK-Sim v8.0     | 34155614 | Clin Pharmacokinet                 | 2021 |
| 15     | Solithromycin                                    | Plasma                                                  | IV, PO (capsule and suspension) | AUC <sub>0-inf</sub> , AUC <sub>0-4h</sub> , C <sub>max</sub> , CL               | -                                       | 1-<6 months, 0.5-<2, 2-<6, 6-<12, and 12-<18 years                                         | Effect of DDI with midazolam or ketoconazole on PK                                                       | -                                                                                             | -                                                                                            | -                                                                                                                                                                                                    | This study               | PK-Sim v9.0     | 34154994 | Drug Metab Dispos                  | 2021 |
| 16     | Gentamicin                                       | Plasma                                                  | IV                              | AUC, C <sub>max</sub>                                                            | Minimal                                 | Neonates with PNA of 0-7 or 8-28 days and PMA of <30, 30-34, or >34 weeks                  | Dose selection in preterm neonate based on developed PBPK-PD model                                       | -                                                                                             | <i>Escherichia coli</i>                                                                      | C <sub>max</sub> /MIC>=8<br>Trough level<=1 µg/mL                                                                                                                                                    | This study               | Simcyp v20.0    | 33945155 | J Clin Pharmacol                   | 2021 |
| 17     | Ceftazidime                                      | Plasma                                                  | IV                              | AUC <sub>0-4h</sub> , C <sub>max</sub>                                           | -                                       | 1 month to 12 years                                                                        | Dose selection in pediatric patients with renal impairment (GFR: 60-89, 30-59, 15-29, <15 mL/min/1.73m2) | -                                                                                             | -                                                                                            | fT>MIC>=70%                                                                                                                                                                                          | This study               | GastroPlus v9.7 | 33556385 | J Pharm Sci                        | 2021 |
| 18     | Gentamicin                                       | Plasma<br>Saliva                                        | IV                              | -                                                                                | Full                                    | Premature infants with a median PNA of 0.08 days                                           | TDM in saliva in premature infants                                                                       | -                                                                                             | -                                                                                            | -                                                                                                                                                                                                    | This study               | PK-Sim v8.0     | 32877949 | Drug Res (Stuttg)                  | 2020 |
| 19     | Fosfomycin<br>Meropenem                          | Plasma                                                  | IV, PO (fosfomycin)             | AUC, C <sub>max</sub>                                                            | -                                       | 0.1-12 years                                                                               | Evaluation of joint probability of target attainment in multidrug-resistant infection                    | -                                                                                             | <i>Enterobacteriaceae</i> ,<br><i>Pseudomonas aeruginosa</i>                                 | Fosfomycin: fAUC/MIC>=40.8<br>Meropenem: fT>MIC>=40%                                                                                                                                                 | This study               | PK-Sim v8.0     | 32638408 | Br J Clin Pharmacol                | 2021 |
| 20     | Ertapenem                                        | Plasma                                                  | IV                              | AUC <sub>0-4h</sub> , C <sub>max</sub>                                           | -                                       | 0-12 years                                                                                 | Dose selection in pediatric patients with renal impairment (GFR: 60-89, 30-59, 15-29, <15 mL/min/1.73m2) | -                                                                                             | -                                                                                            | fT>MIC>=40%                                                                                                                                                                                          | This study               | GastroPlus v9.7 | 32565352 | J Pharm Sci                        | 2020 |
| 21     | Moxifloxacin                                     | Plasma                                                  | IV, PO                          | AUC <sub>0-24h</sub> , C <sub>max</sub>                                          | -                                       | 3 months-<2, 2-<6, and 6-<12, 12-<18 years                                                 | Dose selection in pediatric patients (model verification with the popPK model)                           | -                                                                                             | -                                                                                            | AUC>=45 mg*h/L<br>Cmax=2~6 mg/L                                                                                                                                                                      | Previous study           | PK-Sim v4.2     | 31310051 | CPT Pharmacometrics Syst Pharmacol | 2019 |
| 22     | Trimethoprim/sul<br>famethoxazole                | Plasma<br>Urine                                         | IV, PO                          | AUC, C <sub>max</sub>                                                            | -                                       | 2-5 months, 5 months-1 year, >1-6, >6-12, >12-18 years                                     | Dose selection in pediatric patients                                                                     | -                                                                                             | MRSA                                                                                         | Trimethoprim: 20.6<AUC <sub>ss</sub> <141.8 mg*h/L, C <sub>max</sub> <13.6 mg/L<br>Sulfamethoxazole: AUC <sub>ss</sub> <4119.4 mg*h/L, C <sub>max</sub> <372 mg/L                                    | This study               | PK-Sim v5.5     | 30840200 | Clin Pharmacokinet                 | 2019 |
| 23     | Ciprofloxacin                                    | Plasma<br>Urine<br>Saliva                               | IV, PO                          | -                                                                                | -                                       | 3, 6 and 18 months and 4, 8 and 12 years                                                   | Prediction of plasma and urine profiles in pediatric patients with complicated urinary tract infection   | Complicated urinary tract infection                                                           | -                                                                                            | -                                                                                                                                                                                                    | This study               | PK-Sim v7.2.1   | 30503378 | Eur J Pharm Sci                    | 2019 |
| 24     | Ethionamide                                      | Plasma                                                  | PO                              | AUC, C <sub>max</sub> , T <sub>max</sub> , CL                                    | Full                                    | 0 months- 2 years, 2-6 years, 6-12 years                                                   | Verification of the effect of FMO3 maturational changes on the exposure with increasing age in children  | Tuberculous infection                                                                         | Drug-resistance tuberculosis                                                                 | -                                                                                                                                                                                                    | This study               | Simcyp v15.0    | 29878384 | J Clin Pharmacol                   | 2018 |
| 25     | Vancomycin                                       | Plasma                                                  | IV                              | AUC, C <sub>max</sub>                                                            | Full                                    | 2.6 days-7 years 7 months                                                                  | Changes in the PK profiles in special populations                                                        | -                                                                                             | -                                                                                            | -                                                                                                                                                                                                    | This study               | Simcyp v16.0    | 29446256 | CPT Pharmacometrics Syst Pharmacol | 2018 |

|    |                            |                 |        |                       |                                           |                                                                      |                                               |                                   |      |   |            |              |          |                    |      |
|----|----------------------------|-----------------|--------|-----------------------|-------------------------------------------|----------------------------------------------------------------------|-----------------------------------------------|-----------------------------------|------|---|------------|--------------|----------|--------------------|------|
| 26 | Clindamycin                | Plasma<br>Urine | IV     | -                     | -                                         | 0-5 months, >5 months-1 year, >1-6, >6-12, and >12-18 years          | Dose selection for children of different ages | Community-acquired MRSA infection | MRSA | - | This study | PK-Sim v5.5  | 28290120 | Clin Pharmacokinet | 2017 |
| 27 | Linezolid<br>Emtricitabine | Plasma          | IV, PO | AUC, C <sub>max</sub> | Linezolid: minimal<br>Emtricitabine: full | Neonate (1-28 days) and 3-12 months, 1-2, 3-6, 7-12, and 13-17 years | PK understanding in neonates and infants      | -                                 | -    | - | This study | Simcyp v14.1 | 27596256 | Clin Pharmacokinet | 2017 |
